# Supplementary material
Source: publisher figshare collection journal article supplement (https://sage.figshare.com/ndownloader/files/17513276)
Supplement: Supplementary file 1 [file 17513276]

The influence of masculine norms and mental health on health literacy among men

**Supplementary Table 1: Adjusted linear regression analysis of the association between CMNI total score and continuous PHQ-9, and health literacy scales**

| <b>Model 1: Ability to find good health information (n=8,329)</b>                   |       |          |          |         |
|-------------------------------------------------------------------------------------|-------|----------|----------|---------|
|                                                                                     | Coef. | Lower CI | Upper CI | P value |
| CMNI                                                                                | -0.06 | -0.07    | 0.04     | <0.001  |
| PHQ                                                                                 | -0.13 | -0.15    | -0.11    | <0.001  |
| Constant                                                                            | 15.64 | 15.07    | 16.21    | <0.001  |
| <b>Model 2: Ability to actively engage with healthcare providers (n= 8,324)</b>     |       |          |          |         |
| CMNI                                                                                | -0.07 | -0.09    | -0.05    | <0.001  |
| PHQ                                                                                 | -0.17 | -0.19    | -0.15    | <0.001  |
| Constant                                                                            | 16.04 | 15.42    | 16.66    | <0.001  |
| <b>Model 3: Feeling understood and supported by healthcare providers (n= 8,357)</b> |       |          |          |         |
| CMNI                                                                                | -0.05 | -0.07    | -0.04    | <0.001  |
| PHQ                                                                                 | -0.04 | -0.05    | -0.02    | <0.001  |
| Constant                                                                            | 7.20  | 6.71     | 7.70     | <0.001  |

Note: Adjusted for employment status, education, age group, relationship status, income, country of birth, and region of residence
